# Supplementary material for: Low-Dose Mitomycin C Decreases the Postoperative Recurrence Rate of Pterygium by Perturbing NLRP3 Inflammatory Signalling Pathway and Suppressing the Expression of Inflammatory Factors
Source: Hindawi journal article supplement (doi:10.1155/2019/9472782), 2019-11-15
Supplement: f1 [file 9472782.f1.pdf]

Supplementary Figure S1

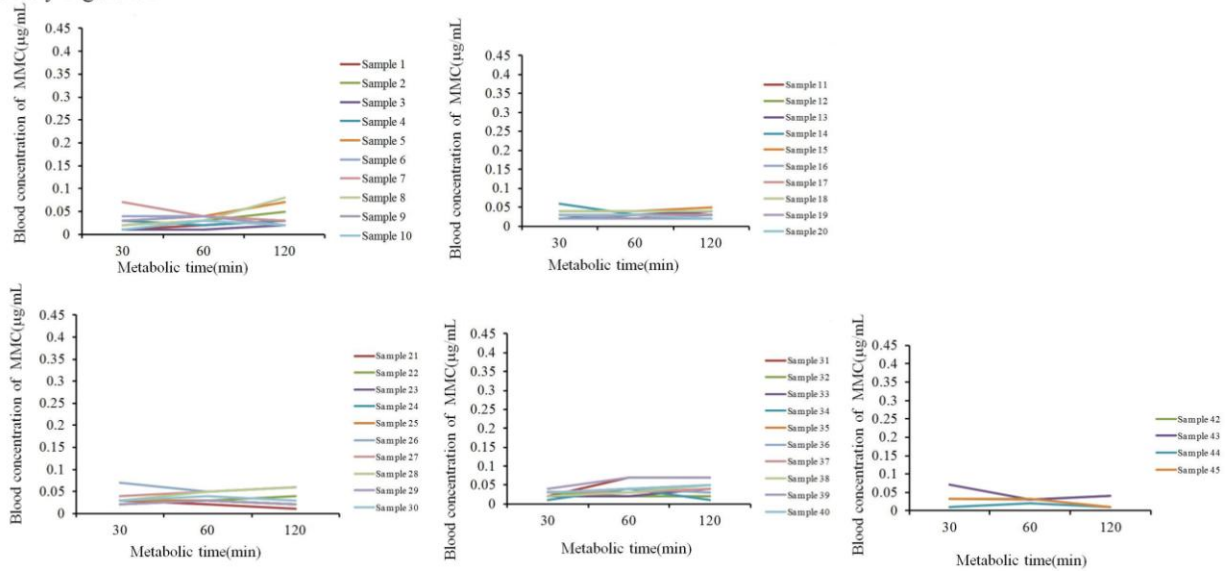

**Supplementary Figure 1: MMC was hardly detected in the blood of Group II patients. Concentration Monitoring of MMC in Group II patients were carried out by switching HPLC, as described in the *Materials and Methods*. Blood concentration of MMC in all of the Group II patients were below the detection limit.**
